# Supplementary material for: Changing global cropping patterns to minimize national blue water scarcity
Source: Copernicus journal article supplement (doi:10.5194/hess-24-3015-2020), 2020-06-09
Supplement: Supplementary file 1 [file hess-24-3015-2020-supplement.pdf]

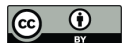

*Supplement of*

## **Changing global cropping patterns to minimize national blue water scarcity**

**Hatem Chouchane et al.**

*Correspondence to:* Hatem Chouchane (hatemchouchane1@gmail.com)

The copyright of individual parts of the supplement might differ from the CC BY 4.0 License.

**Table S1.** Change in harvested area per product group per continent in absolute terms (10<sup>6</sup> ha) when shifting from the cropping pattern in the reference period (1996-2005) to the optimised cropping pattern (with  $\alpha = 1.1$ ).

|               |              | Cereal      | Fibres      | Fruits      | Nuts        | Oil crops   | Pulses      | Roots       | Spices      | Stimulants  | Sugar crops | Vegetables  |
|---------------|--------------|-------------|-------------|-------------|-------------|-------------|-------------|-------------|-------------|-------------|-------------|-------------|
| Africa        | Rainfed      | 2.6         | 0.2         | 0.4         | 0.1         | -2.9        | -0.5        | -0.4        | -0.1        | 0.6         | 0.1         | -0.3        |
|               | Irrigated    | -3.0        | -0.3        | -0.4        | 0.0         | -0.7        | -0.1        | -0.2        | 0.0         | 0.0         | -0.2        | -0.5        |
|               | <b>Total</b> | <b>-0.4</b> | <b>0.0</b>  | <b>0.0</b>  | <b>0.1</b>  | <b>-3.6</b> | <b>-0.6</b> | <b>-0.6</b> | <b>-0.1</b> | <b>0.6</b>  | <b>-0.1</b> | <b>-0.7</b> |
| Asia          | Rainfed      | 1.5         | 0.9         | 1.0         | -0.5        | -1.7        | -2.2        | -0.1        | 0.2         | -0.4        | 0.2         | 1.4         |
|               | Irrigated    | -9.7        | -2.7        | -2.2        | -0.1        | -5.1        | -0.3        | -0.3        | -0.2        | -0.2        | -1.2        | -1.1        |
|               | <b>Total</b> | <b>-8.2</b> | <b>-1.8</b> | <b>-1.2</b> | <b>-0.6</b> | <b>-6.8</b> | <b>-2.5</b> | <b>-0.5</b> | <b>0.0</b>  | <b>-0.6</b> | <b>-1.0</b> | <b>0.3</b>  |
| Europe        | Rainfed      | 1.3         | -0.1        | -0.3        | 0.0         | -0.1        | -0.2        | 0.0         | 0.0         | 0.0         | 0.1         | -0.8        |
|               | Irrigated    | 0.0         | 0.1         | -0.1        | 0.0         | 0.2         | 0.0         | 0.0         | 0.0         | 0.0         | 0.1         | -0.3        |
|               | <b>Total</b> | <b>1.3</b>  | <b>0.0</b>  | <b>-0.3</b> | <b>0.0</b>  | <b>0.1</b>  | <b>-0.2</b> | <b>0.1</b>  | <b>0.0</b>  | <b>0.0</b>  | <b>0.2</b>  | <b>-1.1</b> |
| North America | Rainfed      | -1.4        | 0.3         | 0.1         | 0.0         | 1.4         | 0.4         | -0.2        | 0.0         | -0.6        | 0.2         | -0.2        |
|               | Irrigated    | -0.5        | 0.2         | 0.1         | 0.0         | 0.1         | 0.1         | 0.0         | 0.0         | 0.0         | 0.1         | -0.1        |
|               | <b>Total</b> | <b>-1.9</b> | <b>0.5</b>  | <b>0.2</b>  | <b>0.0</b>  | <b>1.5</b>  | <b>0.4</b>  | <b>-0.2</b> | <b>0.0</b>  | <b>-0.6</b> | <b>0.3</b>  | <b>-0.3</b> |
| Oceania       | Rainfed      | 0.1         | 0.0         | 0.0         | 0.0         | 0.1         | -0.2        | 0.0         | 0.0         | 0.0         | 0.0         | 0.0         |
|               | Irrigated    | 0.0         | 0.0         | 0.0         | 0.0         | 0.0         | 0.0         | 0.0         | 0.0         | 0.0         | 0.0         | 0.0         |
|               | <b>Total</b> | <b>0.1</b>  | <b>0.0</b>  | <b>0.0</b>  | <b>0.0</b>  | <b>0.1</b>  | <b>-0.2</b> | <b>0.0</b>  | <b>0.0</b>  | <b>0.0</b>  | <b>0.0</b>  | <b>0.0</b>  |
| South America | Rainfed      | -2.3        | 0.2         | 0.2         | -0.2        | 2.8         | 0.1         | -0.8        | 0.0         | -0.4        | 0.5         | -0.1        |
|               | Irrigated    | 0.1         | 0.0         | 0.0         | -0.1        | 0.0         | 0.0         | 0.0         | 0.0         | 0.0         | 0.1         | 0.0         |
|               | <b>Total</b> | <b>-2.3</b> | <b>0.2</b>  | <b>0.2</b>  | <b>-0.3</b> | <b>2.8</b>  | <b>0.2</b>  | <b>-0.8</b> | <b>0.0</b>  | <b>-0.5</b> | <b>0.6</b>  | <b>-0.1</b> |

**Table S2.** Change in production per product group per continent in absolute terms ( $10^6 \text{ t yr}^{-1}$ ) when shifting from the cropping pattern in the reference period (1996-2005) to the optimised cropping pattern (with  $\alpha = 1.5$ ).

|               |              | Cereal       | Fibres      | Fruits       | Nuts        | Oil crops    | Pulses      | Roots        | Spices      | Stimulants  | Sugar crops   | Vegetables   |
|---------------|--------------|--------------|-------------|--------------|-------------|--------------|-------------|--------------|-------------|-------------|---------------|--------------|
| Africa        | Rainfed      | 1.5          | 1.7         | 5.5          | 0.2         | -7.3         | 1.7         | 42.6         | -0.1        | 0.1         | 11.3          | -3.3         |
|               | Irrigated    | -18.5        | -0.9        | -10.3        | -0.1        | -1.4         | -0.5        | -2.6         | -0.1        | 0.0         | -29.8         | -13.2        |
|               | <b>Total</b> | <b>-17.0</b> | <b>0.8</b>  | <b>-4.7</b>  | <b>0.1</b>  | <b>-8.7</b>  | <b>1.3</b>  | <b>40.0</b>  | <b>-0.2</b> | <b>0.0</b>  | <b>-18.5</b>  | <b>-16.5</b> |
| Asia          | Rainfed      | 10.5         | 5.8         | 31.8         | 0.7         | 8.1          | -0.6        | 22.2         | 0.9         | 0.4         | 57.7          | 73.9         |
|               | Irrigated    | -106.5       | -9.7        | -51.8        | -0.6        | -10.0        | 0.4         | 13.6         | -0.8        | -0.5        | -331.5        | -41.4        |
|               | <b>Total</b> | <b>-96.0</b> | <b>-3.9</b> | <b>-20.0</b> | <b>0.1</b>  | <b>-1.9</b>  | <b>-0.2</b> | <b>35.9</b>  | <b>0.1</b>  | <b>-0.1</b> | <b>-273.8</b> | <b>32.5</b>  |
| Europe        | Rainfed      | 49.6         | -0.2        | -7.9         | -0.3        | -0.5         | 0.0         | -68.5        | 0.0         | 0.0         | -11.1         | -17.4        |
|               | Irrigated    | -5.4         | -0.7        | -4.5         | -0.1        | -2.0         | 0.3         | 6.2          | 0.0         | 0.0         | 12.3          | -0.5         |
|               | <b>Total</b> | <b>44.2</b>  | <b>-0.9</b> | <b>-12.4</b> | <b>-0.4</b> | <b>-2.5</b>  | <b>0.3</b>  | <b>-62.3</b> | <b>0.0</b>  | <b>0.0</b>  | <b>1.1</b>    | <b>-18.0</b> |
| North America | Rainfed      | 85.1         | 2.8         | 4.6          | 0.0         | -17.3        | 1.7         | 2.5          | 0.0         | 0.0         | 44.0          | -2.5         |
|               | Irrigated    | 20.9         | -0.1        | 10.5         | 0.5         | -8.0         | 0.5         | 10.0         | 0.0         | 0.0         | 23.2          | 7.2          |
|               | <b>Total</b> | <b>106.0</b> | <b>2.7</b>  | <b>15.1</b>  | <b>0.4</b>  | <b>-25.3</b> | <b>2.1</b>  | <b>12.5</b>  | <b>0.0</b>  | <b>0.0</b>  | <b>67.1</b>   | <b>4.7</b>   |
| Oceania       | Rainfed      | 0.6          | 0.0         | 0.2          | 0.0         | 0.5          | -0.7        | 0.2          | 0.0         | 0.0         | -6.2          | -0.6         |
|               | Irrigated    | -1.3         | 0.7         | -0.3         | 0.0         | 0.0          | 0.0         | 0.6          | 0.0         | 0.0         | 7.0           | -0.4         |
|               | <b>Total</b> | <b>-0.7</b>  | <b>0.7</b>  | <b>-0.1</b>  | <b>0.0</b>  | <b>0.5</b>   | <b>-0.7</b> | <b>0.8</b>   | <b>0.0</b>  | <b>0.0</b>  | <b>0.8</b>    | <b>-1.0</b>  |
| South America | Rainfed      | -37.5        | 0.6         | 20.0         | -0.1        | 37.6         | -2.8        | -28.4        | 0.0         | 0.2         | 177.0         | -2.2         |
|               | Irrigated    | 1.0          | 0.0         | 2.0          | -0.1        | 0.3          | 0.1         | 1.6          | 0.0         | -0.1        | 46.3          | 0.4          |
|               | <b>Total</b> | <b>-36.5</b> | <b>0.6</b>  | <b>22.0</b>  | <b>-0.2</b> | <b>37.9</b>  | <b>-2.8</b> | <b>-26.8</b> | <b>0.1</b>  | <b>0.1</b>  | <b>223.3</b>  | <b>-1.8</b>  |

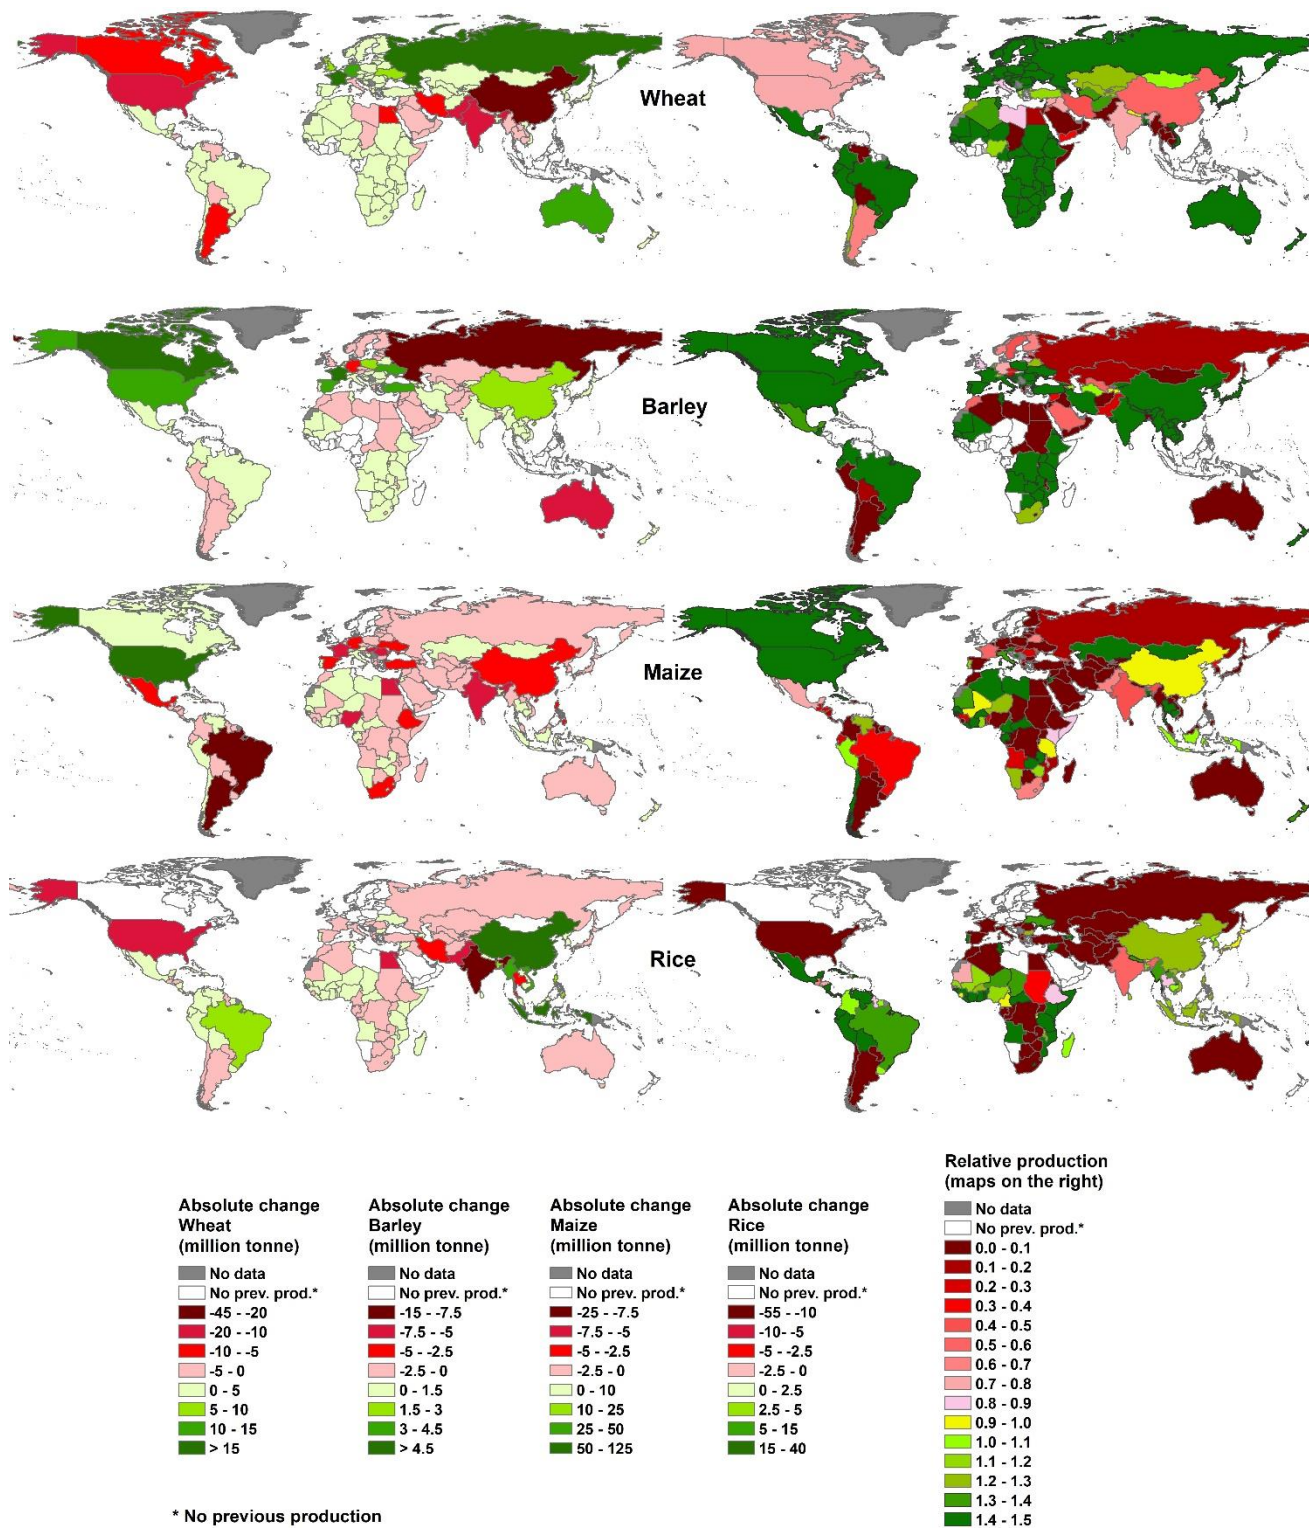

**Figure S1.** Absolute change in production for wheat, barley, maize and rice per country (in  $10^6 \text{ t yr}^{-1}$ ; maps on the left) and relative production (ratio of production in optimized and reference situation) for the same crops groups for the case of an optimized cropping pattern with  $\alpha=1.5$  (maps on the right), all compared to the reference cropping period (1996-2005). Relative production = 1: no change; relative production < 1: national production is reduced; relative production > 1: national production is expanded.

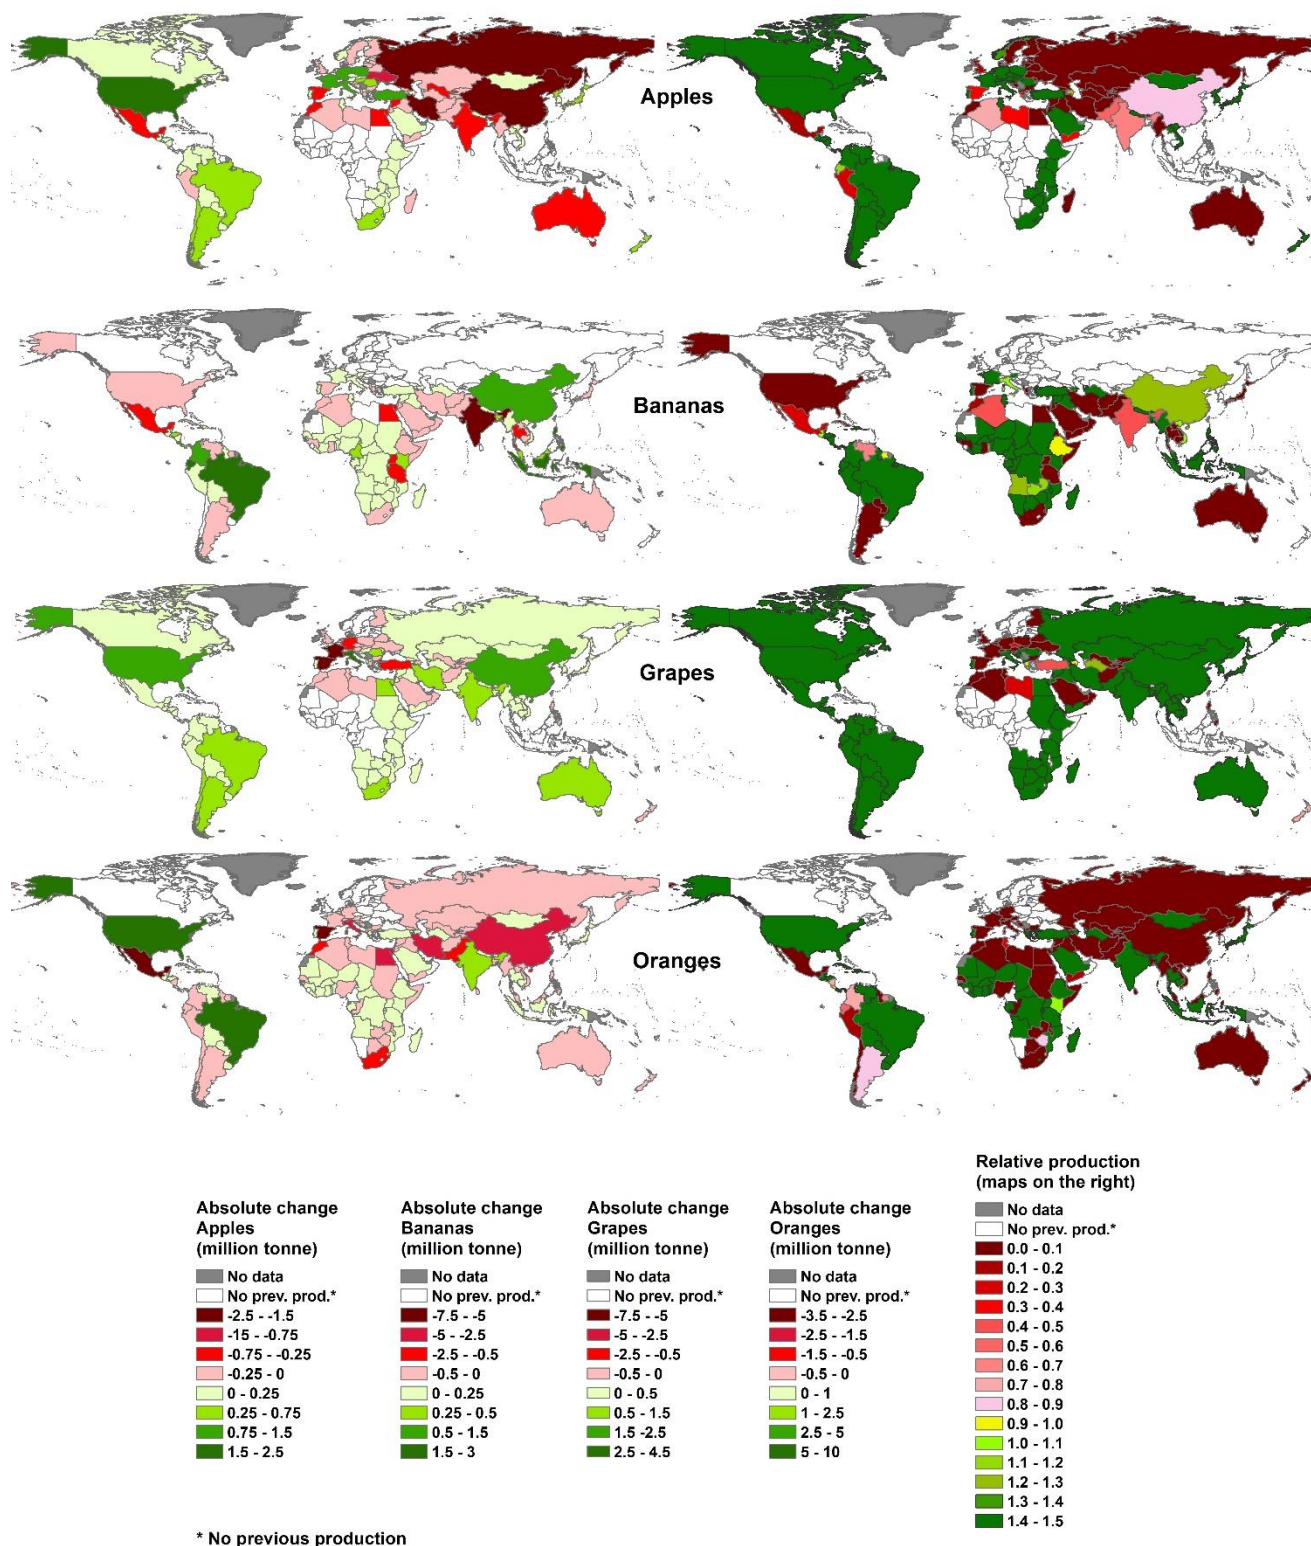

**Figure S2.** Absolute change in production for apples, bananas, grapes and oranges per country (in  $10^6 \text{ t yr}^{-1}$ ; maps on the left) and relative production (ratio of production in optimized and reference situation) for the same crops groups for the case of an optimized cropping pattern with  $\alpha=1.5$  (maps on the right), all compared to the reference cropping period (1996-2005). Relative production = 1: no change; relative production < 1: national production is reduced; relative production > 1: national production is expanded.



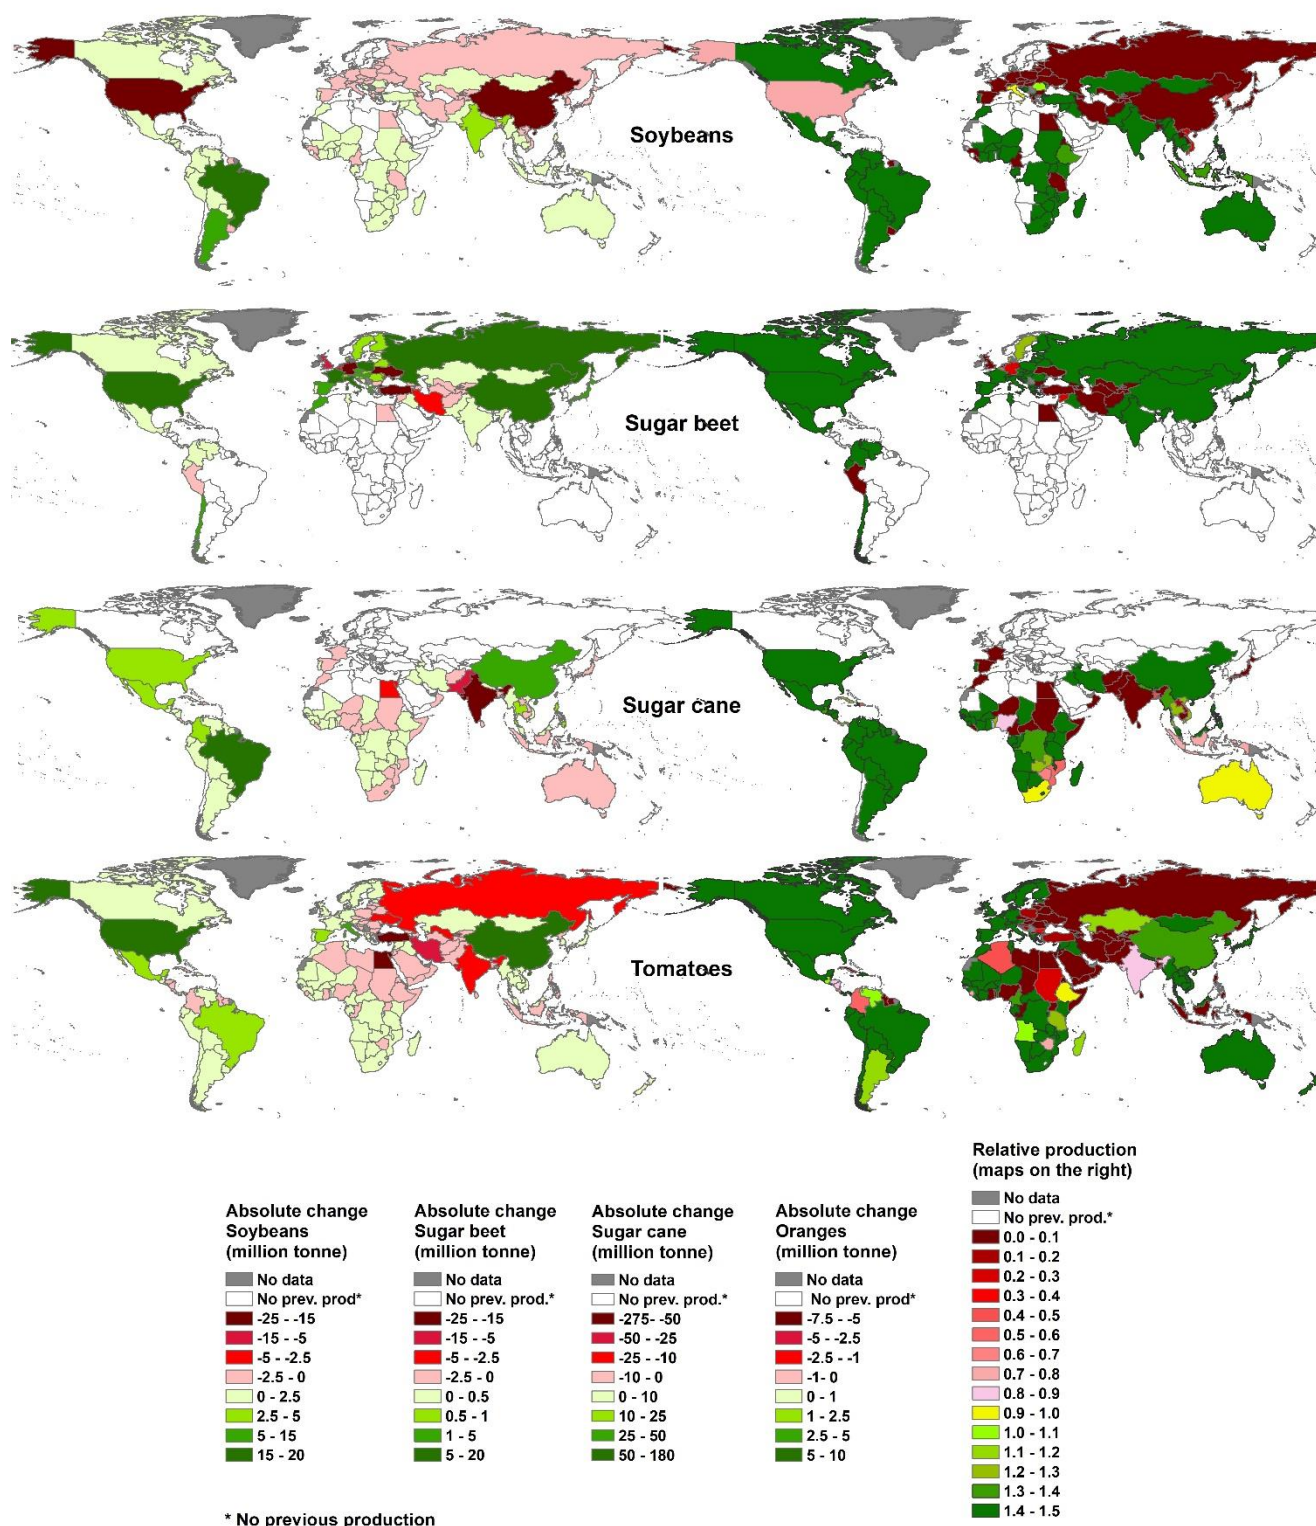

**Figure S3.** Absolute change in production for soybeans, sugar beet, sugar cane and tomatoes per country (in  $10^6 \text{ t yr}^{-1}$ ; maps on the left) and relative production (ratio of production in optimized and reference situation) for the same crops groups for the case of an optimized cropping pattern with  $\alpha=1.5$  (maps on the right), all compared to the reference cropping period (1996-2005). Relative production = 1: no change; relative production < 1: national production is reduced; relative production > 1: national production is expanded.
